# Supplementary material
Source: PubMed Central journal article supplement (PMC4019140)

1 **Supporting Information**

2

3 **Title: Cytosolic DNA-mediated, STING-dependent pro-inflammatory gene**  
4 **induction necessitates canonical NF- $\kappa$ B activation through TBK1**

5

6 **Authors: Abe et al.**

7

8 **Supporting Figure legends**

9 **Fig. S1. STING ligands-mediated signaling response in MEFs.** (A) Primary MEFs (1  
10  $\times 10^5$  cells/well) derived from wild-type (STING<sup>+/+</sup>) or STING-deficient mice  
11 (STING<sup>-/-</sup>) were stimulated with 10  $\mu$ g /ml of canonical 3'-5' cyclic-GMP-AMP  
12 (cGAMP) for the times indicated. The expression level of STING, IRF3 phosphorylated  
13 at Ser<sup>396</sup> (p-IRF3), NF $\kappa$ B p65 phosphorylated at Ser<sup>536</sup> (p-NF- $\kappa$ Bp65), NF- $\kappa$ Bp65,  
14 TBK1 phosphorylated at Ser<sup>172</sup> (p-TBK1), and  $\beta$ -actin was determined by  
15 immunoblotting. (B) Nuclear translocation of NF- $\kappa$ Bp65 is detected by cellular  
16 fractionation. STING<sup>+/+</sup> and STING<sup>-/-</sup> MEFs were stimulated with 10  $\mu$ g /ml of  
17 dsDNA90 for 3 h, and then cells were separated into cytosol and nuclear fractions. Each  
18 fraction was concentrated and subjected to immunoblotting with indicated antibodies.  
19 (C) STING<sup>+/+</sup> and STING<sup>-/-</sup> MEFs were stimulated with 10  $\mu$ g /ml of dsDNA90, 5  $\mu$ g  
20 /ml of Poly(dA:dT), 5  $\mu$ g /ml of Poly(I:C), or 200  $\mu$ M of DMXAA for 6 h, and then  
21 total RNA was extracted from these cells, and the expression level of mRNA of  
22 IFN $\beta$ , Ccl5, IL-6 and CXCL10 was determined by qRT-PCR. Data were normalized to

23 the levels of GAPDH mRNA. Error bars indicate the standard deviations (SD).

24 **Fig. S2. HSV-1-mediated signaling response in MEFs.** (A) Primary MEFs ( $1 \times 10^5$   
25 cells/well) derived from wild-type (STING<sup>+/+</sup>) or STING-deficient mice (STING<sup>-/-</sup>) were  
26 stimulated with 5  $\mu\text{g}/\text{ml}$  of dsDNA representing the genomes of HSV-1 or purified  
27 HSV-1 at an moi of 10 PFU/ml for the times indicated. The expression level of STING,  
28 IRF3 phosphorylated at Ser<sup>396</sup> (p-IRF3), NF $\kappa$ B p65 phosphorylated at Ser<sup>536</sup>  
29 (p-NF- $\kappa$ Bp65), NF- $\kappa$ Bp65, TBK1 phosphorylated at Ser<sup>172</sup> (p-TBK1), TBK1, and  
30  $\beta$ -actin was determined by immunoblotting.

31 **Fig. S3. TBK1 does not involve in the dsDNA-mediated MAPKs activation.** (A)  
32 TBK1<sup>+/+</sup> and TBK1<sup>-/-</sup> MEFs were stimulated with 10  $\mu\text{g}/\text{ml}$  of dsDNA90, or 5  $\mu\text{g}/\text{ml}$  of  
33 Poly(I:C) for the times indicated. The expression level of ERK1/2 phosphorylated at  
34 Thr<sup>202</sup>/Tyr<sup>204</sup> (p-ERK1/2), ERK1/2, SAPK/JNK phosphorylated at Thr<sup>183</sup>/Tyr<sup>185</sup>  
35 (p-SAPK/JNK), JNK1/2, p38 phosphorylated at Thr<sup>180</sup>/Tyr<sup>182</sup> (p-p38), p38, and c-Jun  
36 phosphorylated at Ser<sup>63</sup> (p-cJun) was determined by immunoblotting. (B) 293T cells  
37 were transfected with empty vector (EV) and Flag-tagged TBK1 (TBK1-FL) for 24 h,  
38 and then cell extracts were subjected to immunoblotting with indicated antibodies.

39 **Fig. S4. IKKi/IKK $\epsilon$  and NIK does not involve in the STING-dependent,**  
40 **dsDNA-mediated signaling response in MEFs.** RNAi in MEFs using the non-specific  
41 (NS) and IKKi/IKK $\epsilon$  (A) or NIK (B) were stimulated with 5  $\mu\text{g}/\text{ml}$  of dsDNA90 for the  
42 times indicated. The expression level of STING, IRF3 phosphorylated at Ser<sup>396</sup>  
43 (p-IRF3), NF $\kappa$ B p65 phosphorylated at Ser<sup>536</sup> (p-NF- $\kappa$ Bp65), NF- $\kappa$ Bp65, TBK1  
44 phosphorylated at Ser<sup>172</sup> (p-TBK1), TBK1, NF- $\kappa$ Bp52, NF- $\kappa$ Bp100 phosphorylated at

45 Ser<sup>866/870</sup> (p-NF-κBp100), and β-actin was determined by immunoblotting. (C) RNAi in  
46 MEFs using the non-specific (NS) and IKKi/IKKε (upper panels) or NIK (lower panels)  
47 were stimulated with 5 μg /ml of dsDNA90 for 6 h, and then total RNA was extracted  
48 from these cells, and the expression level of mRNA of IL-6, CXCL10, and  
49 IKKi/IKKε or NIK were determined by real-time PCR, respectively. Real-time PCR  
50 data were normalized to the amount of GAPDH mRNA.

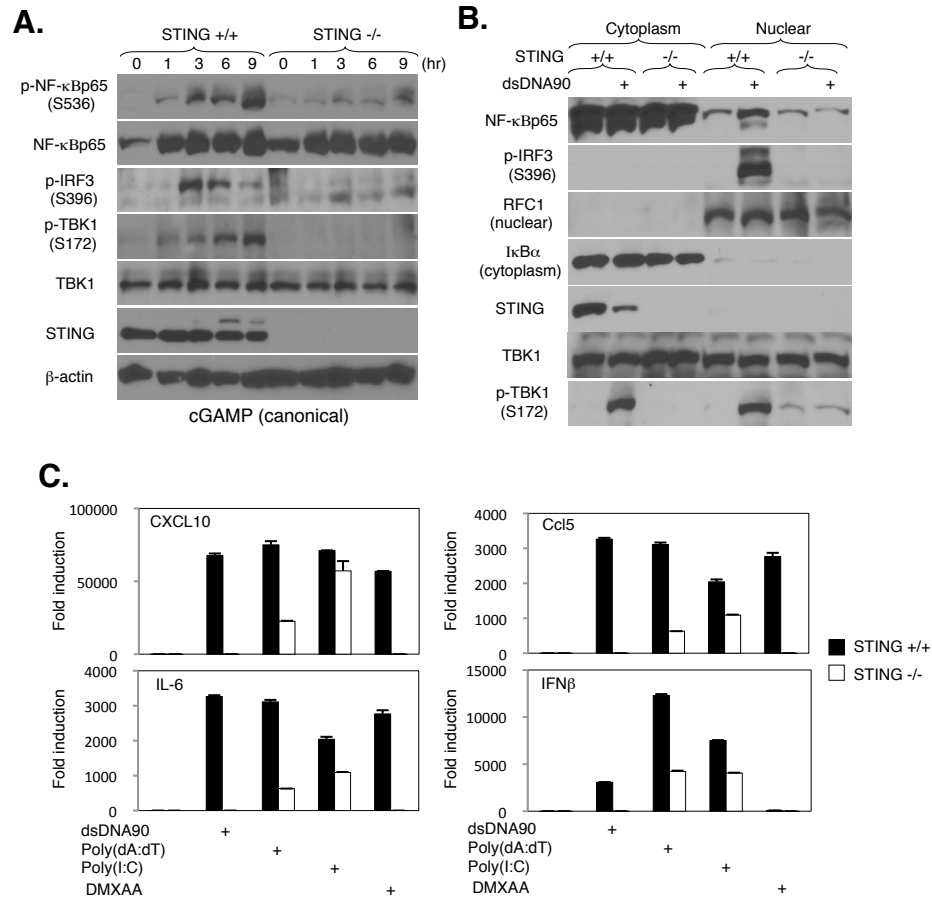



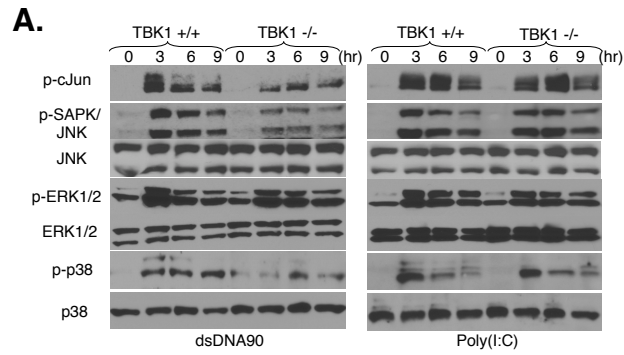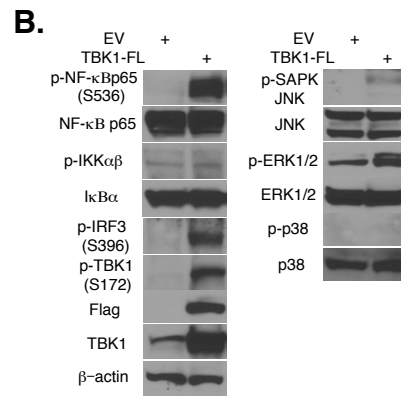

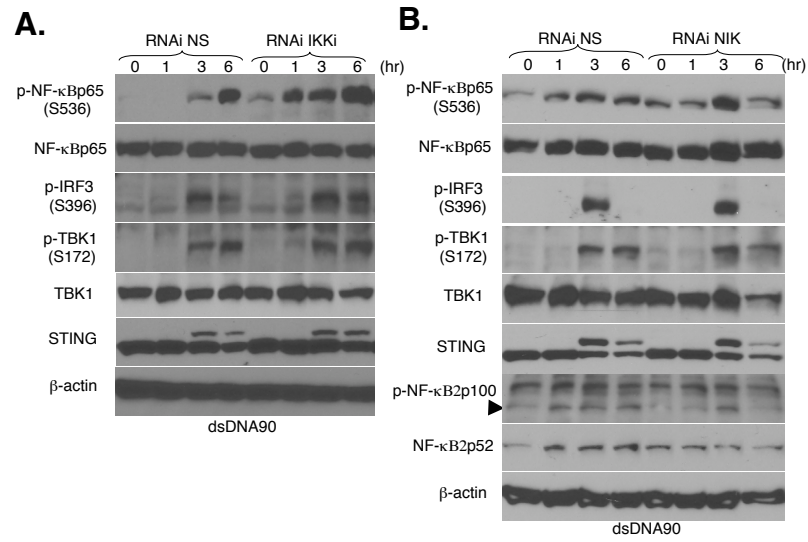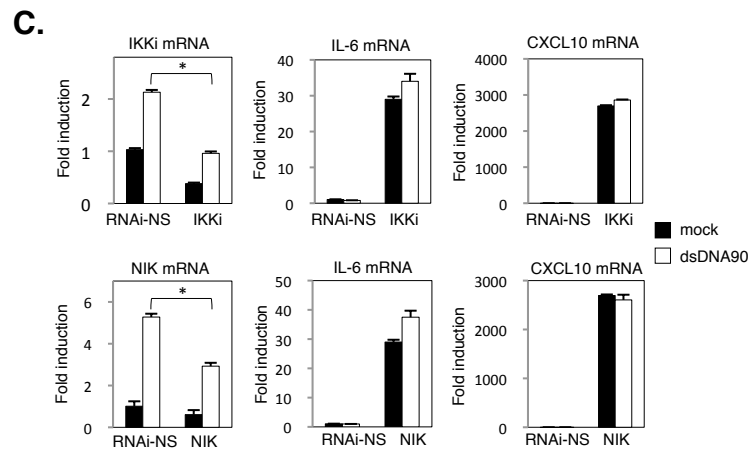

Supplement: JVI.00037-14_zjv999098989so1.pdf [file JVI.00037-14_zjv999098989so1.pdf]
